# Supplementary material for: A dual-function all-inorganic intercluster salt comprising the polycation ε-[Al13O4(OH)24(H2O)12]7+ and polyanion α-[PMo10V2O40]5− for detoxifying sulfur mustard and soman
Source: Royal Society of Chemistry journal article supplement (doi:10.1039/d0dt01307b), 2020-01-01
Supplement: d0dt01307b1.pdf [file d0dt01307b1.pdf]

Supporting Information

**A dual-function all-inorganic intercluster salt comprised of the polycation  $\epsilon$ -  
[Al<sub>13</sub>O<sub>4</sub>(OH)<sub>24</sub>(H<sub>2</sub>O)<sub>12</sub>]<sup>7+</sup> and polyanion  $\alpha$ -[PMo<sub>10</sub>V<sub>2</sub>O<sub>40</sub>]<sup>5-</sup> for detoxifying sulfur mustard and  
soman**

Jialin Yu<sup>a</sup>, Qi Gao<sup>a</sup>, Lijuan Zhang<sup>a\*</sup>, Yunshan Zhou<sup>a\*</sup>, Yuxu Zhong<sup>b\*</sup>, Jianbo Yin<sup>a</sup>, Yuanyuan  
Zhou<sup>a</sup>, Fangsheng Tao<sup>a</sup> and Yong'an Wang

<sup>a</sup>State Key Laboratory of Chemical Resource Engineering, College of Chemistry, Beijing  
University of Chemical Technology, Beijing 100029, P. R. China

<sup>b</sup>Toxicology and Medical Countermeasures, Institute of Pharmacology and Toxicology, Academy  
of Military Sciences PLA China, Beijing 100850, P. R. China

E-mail: zhouys@mail.buct.edu.cn.

**Preparation of the solution containing  $\epsilon$ -[Al<sub>13</sub>O<sub>4</sub>(OH)<sub>24</sub>(H<sub>2</sub>O)<sub>12</sub>]<sup>7+</sup>[<sup>s1</sup>]:** AlCl<sub>3</sub>·6H<sub>2</sub>O (12 g) was dissolved in 200 mL deionized water to prepare 0.25 mol/L AlCl<sub>3</sub> solution. NaOH (4.5 g) was dissolved in 450 mL deionized water to prepare 0.25 mol/L NaOH solution. The NaOH solution was added dropwise and slowly ( $\geq$  15 min) into the AlCl<sub>3</sub> solution at 80°C under stirring to obtain the clear solution containing  $\epsilon$ -[Al<sub>13</sub>O<sub>4</sub>(OH)<sub>24</sub>(H<sub>2</sub>O)<sub>12</sub>]<sup>7+</sup> (6.0 mmol/L), denoted as Al<sub>13</sub><sup>7+</sup>.

**Preparation of crystalline sulfate of Al<sub>13</sub>, viz., Na[Al<sub>13</sub>O<sub>4</sub>(OH)<sub>24</sub>(H<sub>2</sub>O)<sub>12</sub>][SO<sub>4</sub>]<sub>4</sub>·xH<sub>2</sub>O (denoted as Al<sub>13</sub>-SO<sub>4</sub>):** A volume of 170 mL of the Al<sub>13</sub><sup>7+</sup> solution from above was slowly added into 125 mL of 0.1 mol/L Na<sub>2</sub>SO<sub>4</sub>. The mixture was allowed to stand for one day to obtain large amount of precipitate, denoted as Al<sub>13</sub>-SO<sub>4</sub>. IR data (KBr, cm<sup>-1</sup>): 1129 (w), 981 (w), 640 (m), 540 (s), 491 (w)[<sup>s2</sup>].

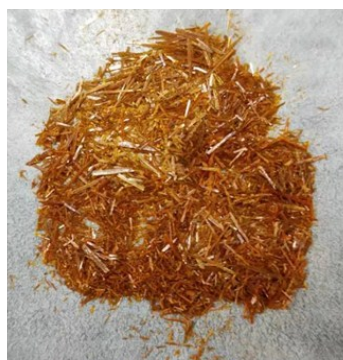

**Figure S1.** Photographic image of Al<sub>13</sub>-PMo<sub>10</sub>V<sub>2</sub>

**Table S1. the selected bond lengths. Al<sub>13</sub>-PM<sub>10</sub>V<sub>2</sub> (refer to the atom numbering schemes)**

| Atom | Atom             | Length/Å  | Atom | Atom             | Length/Å  |
|------|------------------|-----------|------|------------------|-----------|
| M1   | O25              | 1.837(9)  | Al1  | O1               | 1.938(8)  |
| M1   | O26              | 1.839(10) | Al1  | O2               | 1.856(7)  |
| M1   | O27              | 1.627(9)  | Al1  | O3               | 1.849(7)  |
| M1   | O28              | 1.979(9)  | Al1  | O4               | 2.019(7)  |
| M1   | O36 <sup>1</sup> | 1.946(9)  | Al1  | O5               | 1.853(8)  |
| M1   | O63 <sup>1</sup> | 2.375(12) | Al1  | O6               | 1.895(8)  |
| M1   | O65              | 2.456(12) | Al2  | O3               | 1.855(7)  |
| M2   | O28              | 1.842(10) | Al2  | O3 <sup>2</sup>  | 1.855(7)  |
| M2   | O29              | 1.858(10) | Al2  | O4               | 2.032(10) |
| M2   | O30              | 1.625(8)  | Al2  | O7               | 1.969(11) |
| M2   | O31              | 1.925(10) | Al2  | O8               | 1.841(8)  |
| M2   | O32              | 1.926(10) | Al2  | O8 <sup>2</sup>  | 1.841(8)  |
| M2   | O63 <sup>1</sup> | 2.413(11) | Al3  | O8 <sup>2</sup>  | 1.870(8)  |
| M2   | O66 <sup>1</sup> | 2.447(12) | Al3  | O8               | 1.870(8)  |
| M3   | O25 <sup>1</sup> | 1.946(9)  | Al3  | O9               | 1.982(12) |
| M3   | O31              | 1.867(9)  | Al3  | O10              | 1.847(8)  |
| M3)  | O33              | 1.619(8)  | Al3  | O10 <sup>2</sup> | 1.847(8)  |
| M3   | O34              | 1.876(9)  | Al3  | O11              | 2.013(11) |
| M3)  | O42 <sup>1</sup> | 1.925(10) | Al4  | O10              | 1.864(9)  |
| M3   | O65 <sup>1</sup> | 2.455(12) | Al4  | O11              | 2.043(8)  |
| M3   | O66 <sup>1</sup> | 2.400(12) | Al4  | O12              | 1.849(7)  |
| M4   | O64 <sup>1</sup> | 2.335(13) | Al4  | O13              | 1.939(9)  |
| M4   | O64 <sup>1</sup> | 2.335(13) | Al4  | O14              | 1.832(9)  |
| M4   | O37A             | 2.045(17) | Al4  | O15              | 1.865(8)  |
| M4   | O40A             | 1.867(16) | Al5  | O4               | 1.815(10) |
| M5   | O63 <sup>1</sup> | 2.500(12) | Al5  | O11              | 1.806(11) |

|     |                  |           |     |                  |           |
|-----|------------------|-----------|-----|------------------|-----------|
| M5  | O64 <sup>1</sup> | 2.376(12) | Al5 | O16              | 1.817(8)  |
| M5  | O64 <sup>1</sup> | 2.376(12) | Al5 | O16 <sup>2</sup> | 1.817(8)  |
| M5  | O37A             | 2.005(18) | Al6 | O14              | 1.866(9)  |
| M5  | O39A             | 1.845(17) | Al6 | O15              | 1.843(9)  |
| M6  | O64 <sup>1</sup> | 2.408(12) | Al6 | O16              | 2.068(9)  |
| M6  | O64 <sup>1</sup> | 2.408(12) | Al6 | O17              | 1.914(9)  |
| M6  | O39A             | 1.841(18) | Al6 | O18              | 1.865(10) |
| M6  | O40A             | 1.784(17) | Al6 | O19              | 1.837(9)  |
| P1  | O63              | 1.542(12) | Al7 | O16              | 2.035(9)  |
| P1  | O63 <sup>1</sup> | 1.542(12) | Al7 | O18              | 1.852(10) |
| P1  | O66              | 1.506(11) | Al7 | O21              | 1.876(10) |
| P1  | O66 <sup>1</sup> | 1.506(12) | Al7 | O22              | 1.872(9)  |
| P1  | O64              | 1.647(13) | Al7 | O23              | 1.843(9)  |
| P1  | O64 <sup>1</sup> | 1.647(12) | Al7 | O24              | 1.943(11) |
| P1  | O65              | 1.448(12) | Al8 | O5               | 1.841(8)  |
| P1  | O65 <sup>1</sup> | 1.448(12) | Al8 | O6               | 1.878(9)  |
| Al8 | O20              | 1.948(8)  | Al8 | O16              | 1.997(8)  |
| Al8 | O21              | 1.852(9)  | Al8 | O19              | 1.855(9)  |

Symmetry code: <sup>1</sup>-x,1-y,2-z; <sup>2</sup>+x,3/2-y,+z. M stands for Mo (s.o.f. 0.8) + V (s.o.f. 0.2) which share the same site.

**Table S2. Selected bond angles for Al<sub>13</sub>-PM<sub>10</sub>V<sub>2</sub> (refer to the atom numbering schemes).**

| Atom | Atom | Atom             | Angle/°  | Atom | Atom | Atom             | Angle/°  |
|------|------|------------------|----------|------|------|------------------|----------|
| O25  | M1   | O26              | 92.8(4)  | O14  | Al4  | O15              | 77.7(4)  |
| O25  | M1   | O28              | 158.9(4) | O15  | Al4  | O11              | 93.8(3)  |
| O25  | M1   | O36 <sup>1</sup> | 87.6(4)  | O15  | Al4  | O13              | 92.5(4)  |
| O25  | M1   | O63 <sup>1</sup> | 97.0(4)  | O4   | Al5  | O16              | 109.0(3) |
| O25  | M1   | O65              | 65.5(4)  | O4   | Al5  | O16 <sup>2</sup> | 109.0(3) |
| O26  | M1   | O28              | 88.3(4)  | O11  | Al5  | O4               | 108.4(5) |

|                  |    |                  |          |                  |     |                  |          |
|------------------|----|------------------|----------|------------------|-----|------------------|----------|
| O26              | M1 | O36 <sup>1</sup> | 157.9(4) | O11              | A15 | O16              | 111.1(3) |
| O26              | M1 | O63 <sup>1</sup> | 67.2(4)  | O11              | A15 | O16 <sup>2</sup> | 111.1(3) |
| O26              | M1 | O65              | 93.0(5)  | O16 <sup>2</sup> | A15 | O16              | 108.1(6) |
| O27              | M1 | O25              | 101.5(5) | O14              | A16 | O16              | 94.8(4)  |
| O27              | M1 | O26              | 101.4(5) | O14              | A16 | O17              | 93.5(4)  |
| O27              | M1 | O28              | 98.9(5)  | O15              | A16 | O14              | 77.5(4)  |
| O27              | M1 | O36 <sup>1</sup> | 100.1(5) | O15              | A16 | O16              | 95.0(4)  |
| O27              | M1 | O63 <sup>1</sup> | 158.8(5) | O15              | A16 | O17              | 92.3(4)  |
| O27              | M1 | O65              | 161.2(5) | O15              | A16 | O18              | 169.8(4) |
| O28              | M1 | O63 <sup>1</sup> | 64.1(4)  | O17              | A16 | O16              | 169.9(4) |
| O28              | M1 | O65              | 93.4(4)  | O18              | A16 | O14              | 93.8(4)  |
| O36 <sup>1</sup> | M1 | O28              | 83.6(4)  | O18              | A16 | O16              | 80.3(4)  |
| O36 <sup>1</sup> | M1 | O63 <sup>1</sup> | 90.8(4)  | O18              | A16 | O17              | 93.5(4)  |
| O36 <sup>1</sup> | M1 | O65              | 67.1(4)  | O19              | A16 | O14              | 171.8(4) |
| O63 <sup>1</sup> | M1 | O65              | 39.6(4)  | O19              | A16 | O15              | 95.7(4)  |
| O28              | M2 | O29              | 90.9(5)  | O19              | A16 | O16              | 81.0(4)  |
| O28              | M2 | O31              | 160.3(4) | O19              | A16 | O17              | 91.4(4)  |
| O28              | M2 | O32              | 88.5(4)  | O19              | A16 | O18              | 92.5(4)  |
| O28              | M2 | O63 <sup>1</sup> | 65.0(4)  | O18              | A17 | O16              | 81.5(4)  |
| O29              | M2 | O31              | 88.6(4)  | O18              | A17 | O21              | 93.4(5)  |
| O29              | M2 | O32              | 157.0(5) | O18              | A17 | O22              | 170.8(5) |
| O29              | M2 | O63 <sup>1</sup> | 93.7(5)  | O18              | A17 | O24              | 90.7(5)  |
| O30              | M2 | O28              | 99.9(5)  | O21              | A17 | O16              | 81.6(4)  |
| O30              | M2 | O29              | 100.4(5) | O21              | A17 | O24              | 89.8(5)  |
| O30              | M2 | O31              | 99.6(5)  | O22              | A17 | O16              | 93.5(5)  |
| O30              | M2 | O32              | 102.4(5) | O22              | A17 | O21              | 93.6(4)  |
| O30              | M2 | O63 <sup>1</sup> | 159.6(4) | O22              | A17 | O24              | 95.3(5)  |
| O31              | M2 | O32              | 84.3(4)  | O23              | A17 | O16              | 95.2(5)  |
| O31              | M2 | O63 <sup>1</sup> | 95.4(4)  | O23              | A17 | O18              | 94.3(5)  |

|                  |    |                  |          |     |     |     |          |
|------------------|----|------------------|----------|-----|-----|-----|----------|
| O32              | M2 | O63 <sup>1</sup> | 65.3(4)  | O23 | A17 | O21 | 171.1(5) |
| O25 <sup>1</sup> | M3 | O65 <sup>1</sup> | 64.2(4)  | O23 | A17 | O22 | 78.3(5)  |
| O31              | M3 | O25 <sup>1</sup> | 158.2(5) | O23 | A17 | O24 | 94.6(5)  |
| O31              | M3 | O34              | 92.2(4)  | O24 | A17 | O16 | 168.0(5) |
| O31              | M3 | O42 <sup>1</sup> | 87.5(4)  | O5  | A18 | O6  | 80.0(3)  |
| O31              | M3 | O65 <sup>1</sup> | 95.3(4)  | O5  | A18 | O16 | 96.2(3)  |
| O33              | M3 | O25 <sup>1</sup> | 100.8(4) | O5  | A18 | O19 | 94.2(4)  |
| O33              | M3 | O31              | 100.7(5) | O5  | A18 | O20 | 89.6(4)  |
| O33              | M3 | O34              | 102.0(5) | O5  | A18 | O21 | 173.7(4) |
| O33              | M3 | O42 <sup>1</sup> | 100.1(5) | O6  | A18 | O16 | 92.5(3)  |
| O33              | M3 | O65 <sup>1</sup> | 161.6(5) | O6  | A18 | O20 | 92.8(4)  |
| O34              | M3 | O25 <sup>1</sup> | 87.1(4)  | O19 | A18 | O6  | 172.0(4) |
| O34              | M3 | O42 <sup>1</sup> | 157.6(5) | O19 | A18 | O16 | 82.5(4)  |
| O34              | M3 | O65 <sup>1</sup> | 68.1(4)  | O19 | A18 | O20 | 92.7(4)  |
| O42 <sup>1</sup> | M3 | O25 <sup>1</sup> | 85.0(4)  | O20 | A18 | O16 | 172.8(4) |
| O42 <sup>1</sup> | M3 | O65 <sup>1</sup> | 89.6(5)  | O21 | A18 | O6  | 93.7(4)  |
| O34              | M4 | O37              | 79.6(6)  | O21 | A18 | O16 | 83.2(4)  |
| O34              | M4 | O40              | 167.0(6) | O21 | A18 | O19 | 91.9(4)  |
| O34              | M4 | O64 <sup>1</sup> | 94.5(4)  | O21 | A18 | O20 | 91.5(4)  |
| O35              | M4 | O34              | 100.5(4) | O1  | A11 | O4  | 172.9(4) |
| O35              | M4 | O36              | 101.3(5) | O2  | A11 | O1  | 91.3(3)  |
| O35              | M4 | O37              | 112.6(7) | O2  | A11 | O4  | 84.0(3)  |
| O35              | M4 | O40              | 90.0(6)  | O2  | A11 | O6  | 93.3(4)  |
| O35              | M4 | O64 <sup>1</sup> | 157.1(5) | O3  | A11 | O1  | 92.7(3)  |
| O36              | M4 | O34              | 88.1(4)  | O3  | A11 | O2  | 93.7(4)  |
| O36              | M4 | O37              | 145.5(7) | O3  | A11 | O4  | 82.4(4)  |
| O36              | M4 | O40              | 97.5(6)  | O3  | A11 | O5  | 93.5(3)  |
| O36              | M4 | O64 <sup>1</sup> | 96.5(4)  | O3  | A11 | O6  | 170.4(4) |
| O37              | M4 | O40              | 89.3(7)  | O5  | A11 | O1  | 90.4(3)  |

|                  |    |                  |          |                  |     |                 |          |
|------------------|----|------------------|----------|------------------|-----|-----------------|----------|
| O37              | M4 | O64 <sup>1</sup> | 53.2(6)  | O5               | A11 | O2              | 172.5(4) |
| O40              | M4 | O64 <sup>1</sup> | 73.2(6)  | O5               | A11 | O4              | 95.0(3)  |
| O26              | M5 | O39              | 90.4(6)  | O5               | A11 | O6              | 79.3(3)  |
| O26              | M5 | O63 <sup>1</sup> | 63.1(4)  | O6               | A11 | O1              | 93.6(3)  |
| O26              | M5 | O64 <sup>1</sup> | 96.4(4)  | O6               | A11 | O4              | 91.9(4)  |
| O32              | M5 | O26              | 87.4(4)  | O3 <sup>2</sup>  | A12 | O3              | 94.7(5)  |
| O32              | M5 | O39              | 167.8(6) | O3               | A12 | O4              | 81.8(3)  |
| O32              | M5 | O63 <sup>1</sup> | 64.5(4)  | O3 <sup>2</sup>  | A12 | O4              | 81.8(3)  |
| O32              | M5 | O64 <sup>1</sup> | 97.5(4)  | O3               | A12 | O7              | 90.4(3)  |
| O37              | M5 | O26              | 148.4(7) | O3 <sup>2</sup>  | A12 | O7              | 90.4(3)  |
| O37              | M5 | O32              | 86.3(7)  | O7               | A12 | O4              | 168.5(5) |
| O37              | M5 | O39              | 89.3(7)  | O8               | A12 | O3 <sup>2</sup> | 171.5(4) |
| O37              | M5 | O63 <sup>1</sup> | 86.3(8)  | O8               | A12 | O3              | 92.8(3)  |
| O37              | M5 | O64 <sup>1</sup> | 53.9(7)  | O8 <sup>2</sup>  | A12 | O3              | 171.5(4) |
| O38              | M5 | O26              | 98.1(4)  | O8 <sup>2</sup>  | A12 | O3 <sup>2</sup> | 92.8(3)  |
| O38              | M5 | O32              | 100.1(4) | O8 <sup>2</sup>  | A12 | O4              | 95.3(3)  |
| O38              | M5 | O37              | 113.5(7) | O8               | A12 | O4              | 95.3(3)  |
| O38              | M5 | O39              | 92.2(6)  | O8 <sup>2</sup>  | A12 | O7              | 93.5(4)  |
| O38              | M5 | O63 <sup>1</sup> | 154.9(4) | O8               | A12 | O7              | 93.5(4)  |
| O38              | M5 | O64 <sup>1</sup> | 157.6(4) | O8               | A12 | O8 <sup>2</sup> | 79.5(5)  |
| O39              | M5 | O63 <sup>1</sup> | 103.8(6) | O8               | A13 | O8 <sup>2</sup> | 78.0(5)  |
| O39              | M5 | O64 <sup>1</sup> | 70.7(6)  | O8 <sup>2</sup>  | A13 | O9              | 92.7(4)  |
| O64 <sup>1</sup> | M5 | O63 <sup>1</sup> | 47.3(4)  | O8               | A13 | O9              | 92.7(4)  |
| O29 <sup>1</sup> | M6 | O39              | 163.8(6) | O8               | A13 | O11             | 95.1(3)  |
| O29 <sup>1</sup> | M6 | O40              | 89.4(6)  | O8 <sup>2</sup>  | A13 | O11             | 95.1(3)  |
| O29 <sup>1</sup> | M6 | O64 <sup>1</sup> | 92.9(5)  | O9               | A13 | O11             | 169.9(5) |
| O39              | M6 | O40              | 81.4(7)  | O10              | A13 | O8 <sup>2</sup> | 172.0(4) |
| O39              | M6 | O64 <sup>1</sup> | 71.5(6)  | O10              | A13 | O8              | 94.3(3)  |
| O40              | M6 | O64 <sup>1</sup> | 70.1(6)  | O10 <sup>2</sup> | A13 | O8              | 171.9(4) |

|                  |    |                  |          |                  |     |                  |          |
|------------------|----|------------------|----------|------------------|-----|------------------|----------|
| O41              | M6 | O29 <sup>1</sup> | 100.8(4) | O10 <sup>2</sup> | A13 | O8 <sup>2</sup>  | 94.3(3)  |
| O41              | M6 | O39              | 92.6(6)  | O10 <sup>2</sup> | A13 | O9               | 89.8(4)  |
| O41              | M6 | O40              | 90.4(6)  | O10              | A13 | O9               | 89.8(4)  |
| O41              | M6 | O42              | 102.2(4) | O10              | A13 | O10 <sup>2</sup> | 93.4(5)  |
| O41              | M6 | O64 <sup>1</sup> | 156.1(4) | O10              | A13 | O11              | 83.3(4)  |
| O42              | M6 | O29 <sup>1</sup> | 87.0(5)  | O10 <sup>2</sup> | A13 | O11              | 83.3(4)  |
| O42              | M6 | O39              | 99.2(6)  | O10              | A14 | O11              | 82.1(4)  |
| O42              | M6 | O40              | 167.4(6) | O10              | A14 | O13              | 88.9(4)  |
| O42              | M6 | O64 <sup>1</sup> | 98.0(5)  | O10              | A14 | O15              | 94.3(4)  |
| O63              | P1 | O63 <sup>1</sup> | 180.0(8) | O12              | A14 | O10              | 93.1(5)  |
| O63              | P1 | O64 <sup>1</sup> | 104.3(6) | O12              | A14 | O11              | 82.0(3)  |
| O63              | P1 | O64              | 75.7(6)  | O12              | A14 | O13              | 92.9(4)  |
| O66              | P1 | O64              | 105.2(6) | O12              | A14 | O15              | 170.9(5) |
| O66 <sup>1</sup> | P1 | O64              | 74.8(6)  | O13              | A14 | O11              | 169.3(5) |
| O64 <sup>1</sup> | P1 | O64              | 180.0    | O14              | A14 | O10              | 171.5(4) |
| O65 <sup>1</sup> | P1 | O63              | 66.4(6)  | O14              | A14 | O11              | 95.2(4)  |
| O65 <sup>1</sup> | P1 | O63 <sup>1</sup> | 113.6(6) | O14              | A14 | O12              | 94.5(5)  |
| O65              | P1 | O66 <sup>1</sup> | 114.4(7) | O14              | A14 | O13              | 94.5(4)  |
| O65 <sup>1</sup> | P1 | O66 <sup>1</sup> | 65.6(7)  | O65 <sup>1</sup> | P1  | O64 <sup>1</sup> | 72.2(6)  |

Symmetry code:  $^1-x, 1-y, 2-z; ^2+x, 3/2-y, +z$ . M stands for Mo (s.o.f. 0.8) + V (s.o.f. 0.2) which share the same site.

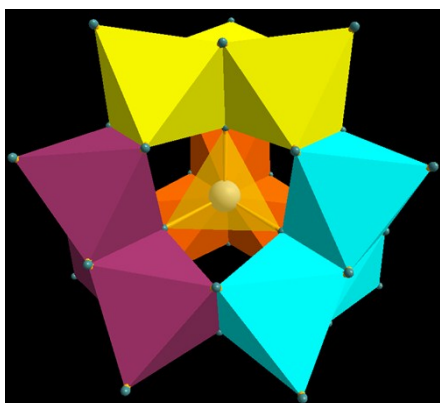

**Figure S2.** Polyhedral representation of  $\epsilon$ - $[\text{Al}_{13}\text{O}_4(\text{OH})_{24}(\text{H}_2\text{O})_{12}]^{7+}$  composed of four three-Al subclusters (one three-Al subcluster is shown in cyan, one in yellow, one in purple, and the fourth in orange) surrounding a  $\text{AlO}_4$  tetrahedron (shown in gold color) with hexagon-shaped faces and four small triangle-shaped faces, which are composed of the edge-sharing OH ligands and terminal  $\text{H}_2\text{O}$  ligands. (H atoms of bridging OH and of aqua ligand are not shown for clarity).

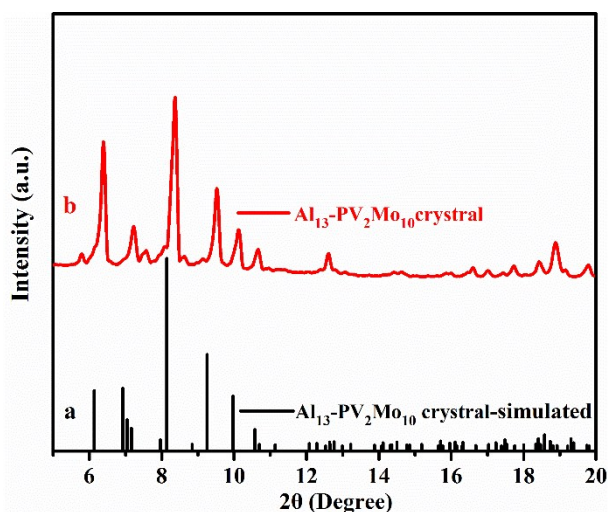

**Figure S3.** The simulated P-XRD patterns of  $\text{Al}_{13}\text{-PMo}_{10}\text{V}_2$  crystal (a) and the experimental P-XRD patterns of  $\text{Al}_{13}\text{-PMo}_{10}\text{V}_2$  crystal (b).

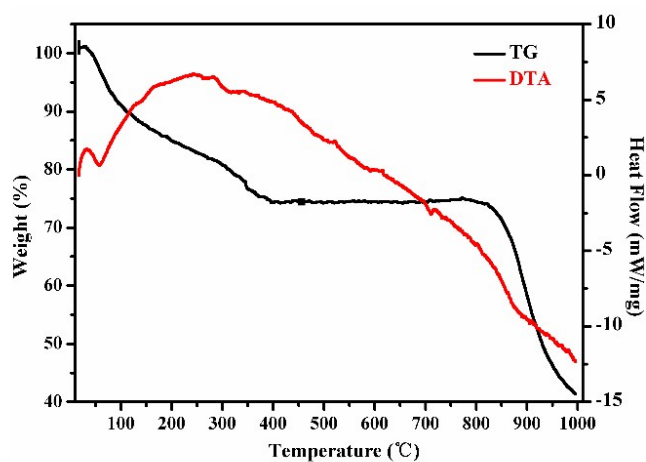

**Figure S4.** TG-DTA curve of  $\text{Al}_{13}\text{-PMo}_{10}\text{V}_2$ .



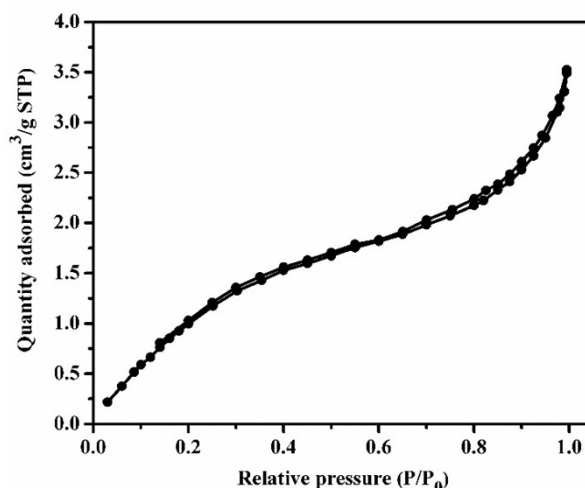

**Figure S5.** The N<sub>2</sub> adsorption/desorption isotherm plot of Al<sub>13</sub>-PMO<sub>10</sub>V<sub>2</sub> at 77K.

### Establishment of the HD Standard Curve

The HD standard curve was established according to the Frank's method<sup>[3]</sup>. First, 5  $\mu$ L of HD was dissolved in 1 mL of petroleum ether. After mixing, 200  $\mu$ L of the solution was removed and added to 800  $\mu$ L of petroleum ether to obtain a 1 mg/mL HD stock solution. Then, 0, 20, 40, 60, 80, and 100  $\mu$ L of HD stock, and 100, 80, 60, 40, 20, and 0  $\mu$ L of petroleum ether, were added into six individual centrifuge tubes, respectively. Subsequently, 100  $\mu$ L of anhydrous ethanol and 200  $\mu$ L of Blue reagent were added into each tube to obtain six HD standard solutions at different concentrations. The standard solutions were incubated in an 80°C water bath for 15 min, cooled to room temperature. Then, 5  $\mu$ L of 0.6 mol/L acetic acid solution and 3 mL of 95% ethanol solution were added into each tube to obtain diluted standard solutions (Figure S6). UV absorbance of the standard solution was measured at the maximum absorption wavelength of  $\lambda_{\max}$  = 445 nm (Figure S7). The absorption values were plotted against the concentration of the standard solutions. After linear fitting, the HD standard curve was obtained as  $Y = 0.07718X + 0.02558$  ( $R^2 = 0.998$ ) (Eq. s1), where Y stands for absorbance  $\lambda_{\max}$  = 445 nm and X stands for HD concentration ( $\mu$ g/mL).

After degradation of HD with various decontaminants, the UV absorption of the reaction solution at the maximum absorption wavelength was measured, and the residual HD concentration was calculated according to Eq. s1. Subsequently, the decontamination efficiency  $\eta$  of HD by

various decontaminants was obtained using the equation  $\eta = \left( \frac{C_0 - C_A}{C_0} \right) \times 100\%$  (Eq. s2), where  $C_0$  is the initial HD concentration,  $C_A$  is the remaining HD concentration after decontamination.

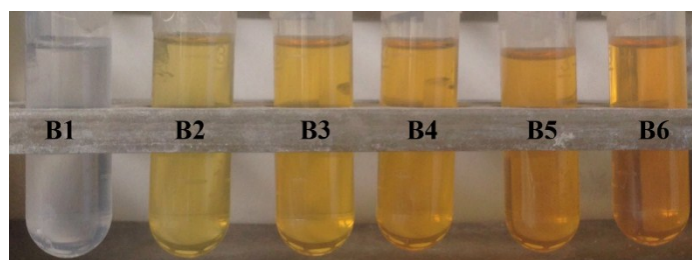

**Figure S6.** Image of the HD standard solutions at various concentration (B1-B6).

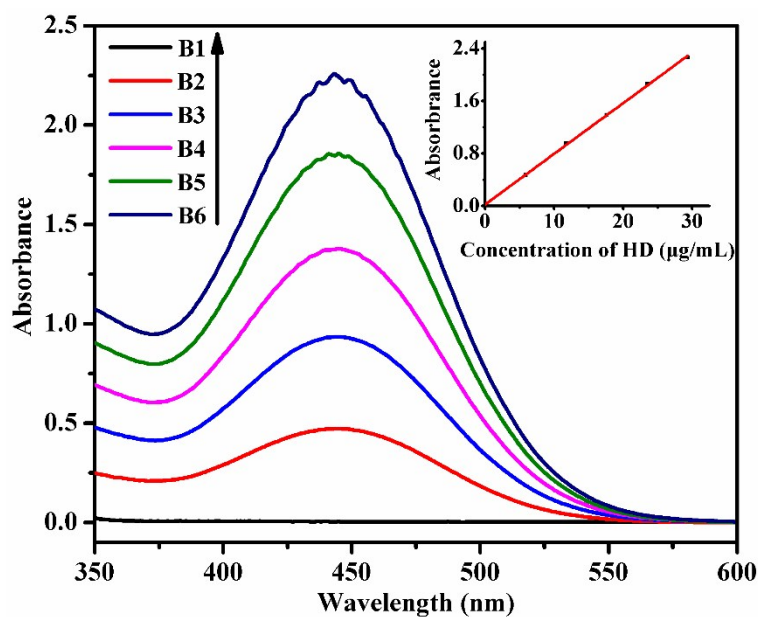

**Figure S7.** UV absorption spectra of the HD standard solutions. Inset: linear relationship between UV absorption and HD concentration at the maximum absorption wavelength. B1-B6: HD standard solutions with the concentration of 0, 5.874, 11.748, 17.621, 23.495, 29.369  $\mu\text{g/mL}$ , respectively. Solvent: 95% ethanol.

#### Establishment of the GD Standard Curve

The following method was used to prepare the GD stand curve<sup>[s3]</sup>. GD (5  $\mu\text{L}$ ) was dissolved in 1 mL of isopropanol. After mixing, 200  $\mu\text{L}$  of the solution was added to 800  $\mu\text{L}$  of isopropanol to obtain a 1 mg/mL GD stock solution. GD stock solution of 0, 20, 40, 60, 80, and 100  $\mu\text{L}$  were added to 100, 80, 60, 40, 20, and 0  $\mu\text{L}$  of isopropanol, respectively. Subsequently, 100  $\mu\text{L}$  of 0.2% (w/w) benzidine and 100  $\mu\text{L}$  of 1% (w/w) sodium perborate were added to each tube to obtain GD standard solutions at different concentrations. The standard solutions were incubated in a 37°C water bath for 15 min, cooled to room temperature, and 3 mL of isopropanol were added into each tube to obtain the diluted standard solutions (Figure S8). UV absorbance was measured at 425 nm

(Figure S9). The ultraviolet absorption values were plotted against the concentration of the standard solutions. After the linear fitting, the GD standard curve was obtained as  $Y = 0.1368 + 0.03221X$  ( $R^2 = 0.998$ ) (Eq. s3), where Y stands for absorbance at  $\lambda_{\max} = 425$  nm and X stands for GD concentration ( $\mu\text{g/mL}$ ).

After degradation of GD with various decontaminants, the UV absorption of the reaction solution at the maximum absorption wavelength was measured, and the residual GD concentration was calculated according to Eq. s3. Subsequently, the decontamination efficiency  $\eta$  of GD by

various decontaminants was obtained using the equation  $\eta = \left( \frac{C_0 - C_A}{C_0} \right) \times 100\%$  (eq. s4), where  $C_0$  is the initial GD concentration,  $C_A$  is the remaining GD concentration after decontamination.

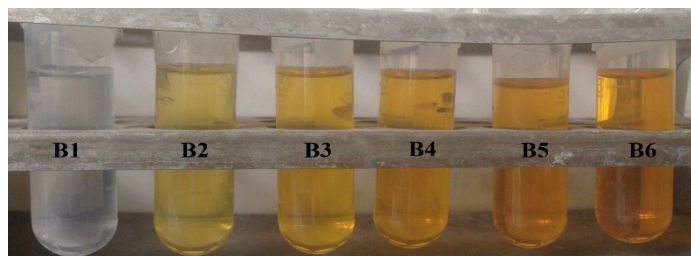

**Figure S8.** Image of the GD standard solutions at various concentration (B1-B6).

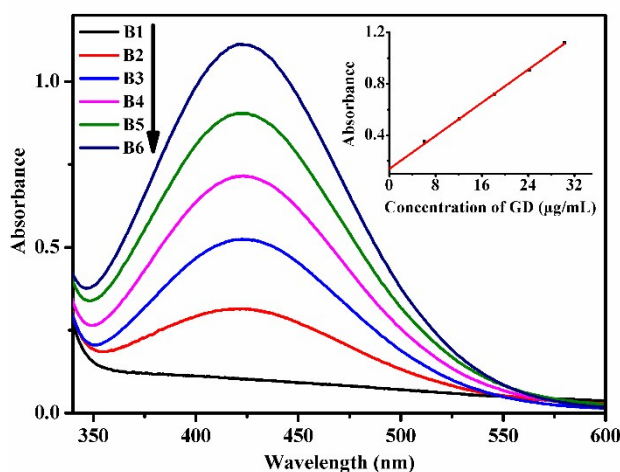

**Figure S9.** UV absorption spectra of the GD standard solutions. Inset: linear relationship between UV absorption and GD concentration at the maximum absorption wavelength. B1-B6: GD standard solutions with the concentration of 0, 6.061, 12.12, 18.18, 24.24, 30.31  $\mu\text{g/mL}$ . Solvent: isopropanol.

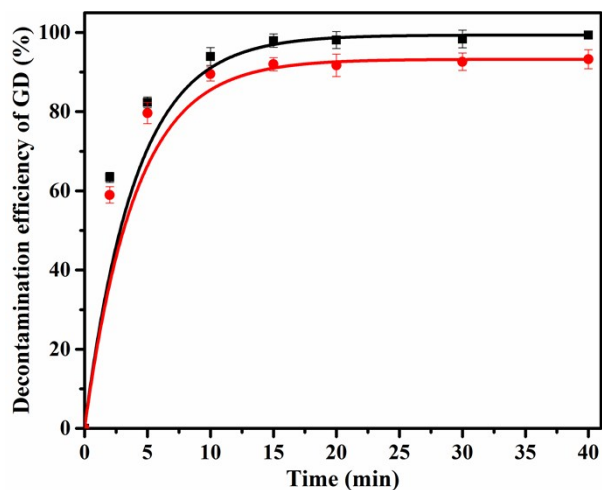

**Figure S10.** Comparison of the degradation efficiency of Al<sub>13</sub>-PMo<sub>10</sub>V<sub>2</sub> (black) and MOF-808 (red). Degradation condition: 25°C, 40 min. Degradation agent dosage: 50 mg. GD solution: 4 μL of GD dissolved in 40 μL of isopropanol solution.

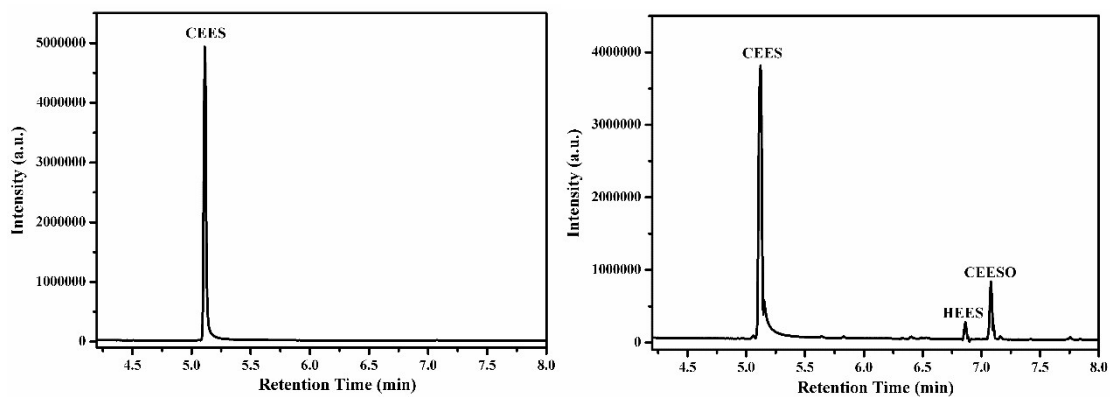

**Figure S11.** The GC chromatograms of pure CEES and degradation products of CEES after degradation with Al<sub>13</sub>-PMo<sub>10</sub>V<sub>2</sub>.

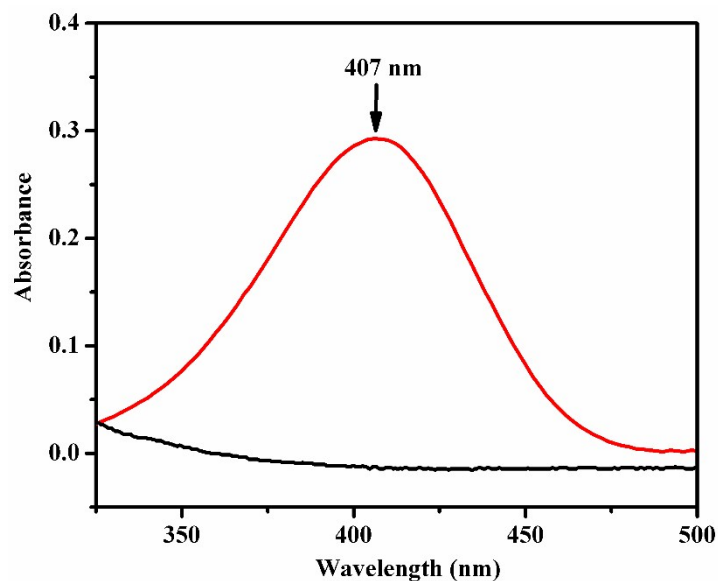

**Figure S12.** The UV absorption spectra of pristine DMNP (black) solution and the DMNP S12

solution after degradation by  $\text{Al}_{13}\text{-PMo}_{10}\text{V}_2$  (red). Degradation condition: 25°C. Dosage of  $\text{Al}_{13}\text{-PMo}_{10}\text{V}_2$ : 50 mg. 0.5 mL of DMNP in a solution of acetone and water (9:1 v/v). Degradation time: 1 h.

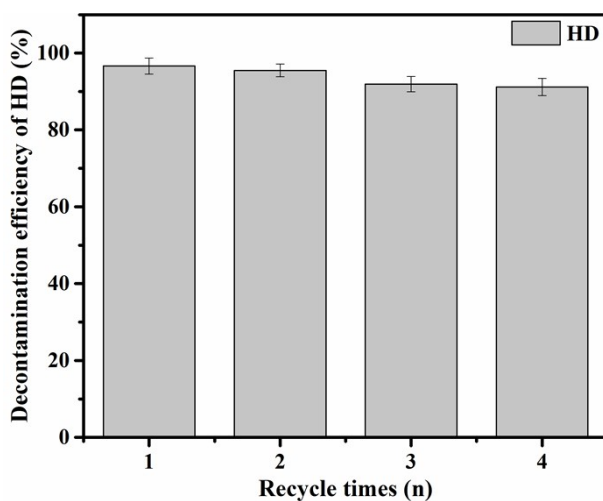

**Figure S13.** The reusability of  $\text{Al}_{13}\text{-PMo}_{10}\text{V}_2$  for degrading HD. Degradation condition: 25°C. HD solution: 4  $\mu\text{L}$  of HD dissolved in 40  $\mu\text{L}$  of petroleum ether solution. Reaction time: 120 min.

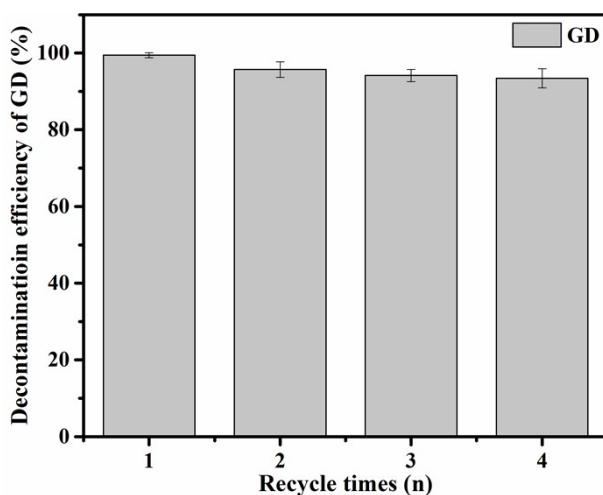

**Figure S14.** The reusability of  $\text{Al}_{13}\text{-PMo}_{10}\text{V}_2$  for degrading GD. Degradation condition: 25°C, 40 min. GD solution: 4  $\mu\text{L}$  of GD dissolved in 40  $\mu\text{L}$  of isopropanol solution.

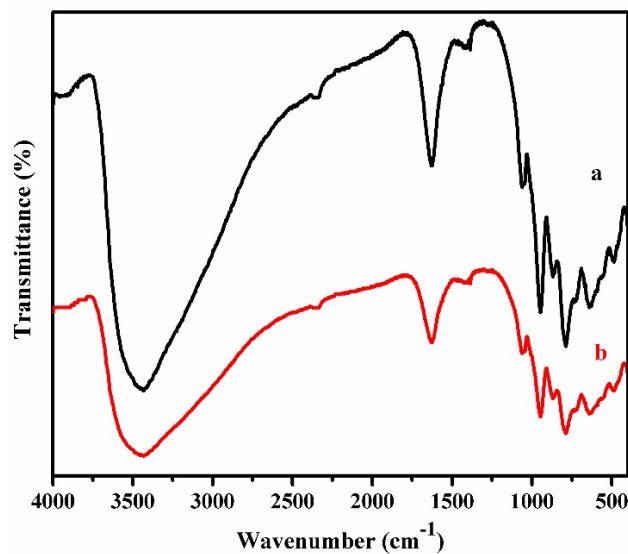

**Figure S15.** Infrared spectra of  $\text{Al}_{13}\text{-PMo}_{10}\text{V}_2$  before (a) and after (b) degradation of HD/GD.

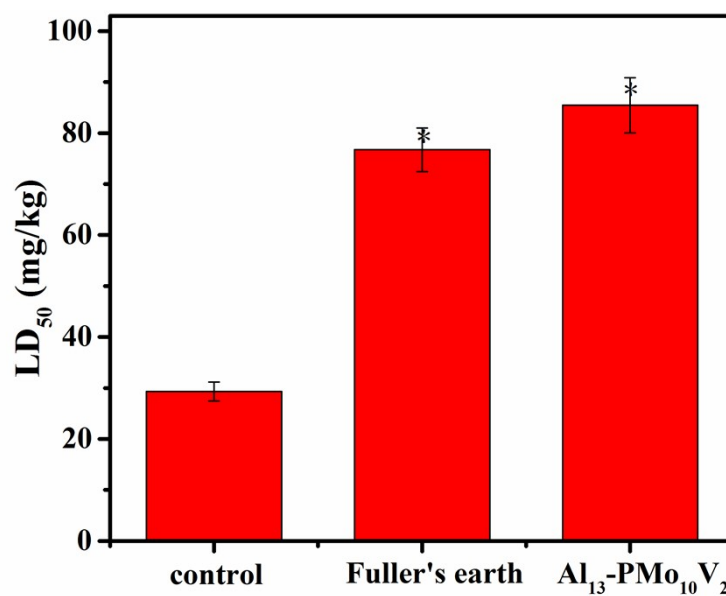

**Figure S16.** Median lethal dose (LD<sub>50</sub>) values for the decontamination products in mice model. Error bars = 95% confidence interval (CI). The number of animals used per treatment group was 50. All animals were challenged with neat soman (GD).

## References

- [s1] Mizuno K, Mura T, Uchida S. Control of Polymorphisms and Functions in All-Inorganic Ionic Crystals Based on Polyaluminum Hydroxide and Polyoxometalates. *Crystal Growth & Design*, 2016, 16(9): 4968-4974.

- [s2] Wang M, Muhammed M. Novel synthesis of  $Al_{13}$ -cluster based alumina materials. *Nanostructured materials*, 1999, 11(8): 1219-1229.
- [s3] Zhang L, Sun J, Zhou Y, Zhong Y, Ying Y, Li Y, Liu Y, Zuhra Z, Huang C. Layer-by-layer assembly of  $Cu_3(BTC)_2$  on chitosan non-woven fabrics: a promising haemostatic decontaminant composite material against sulfur mustard. *Journal of Materials Chemistry B*, 2017, 5(30): 6138--6146.
